# Supplementary material for: The ‘π-Trap’ as an Unrestricted Crystal Sponge for Inherently Amorphous Cluster Compounds
Source: Research Square preprint supplement (doi:10.21203/rs.3.rs-5953585/v1), 2025-02-24

## checkCIF/PLATON report

Structure factors have been supplied for datablock(s) 3

THIS REPORT IS FOR GUIDANCE ONLY. IF USED AS PART OF A REVIEW PROCEDURE FOR PUBLICATION, IT SHOULD NOT REPLACE THE EXPERTISE OF AN EXPERIENCED CRYSTALLOGRAPHIC REFEREE.

No syntax errors found.      CIF dictionary      Interpreting this report

### Datablock: 3

---

Bond precision:      C-C = 0.0115 Å      Wavelength=1.34143

Cell:                      a=18.6432 (11)      b=25.1311 (15)      c=28.9919 (17)  
                                alpha=90                  beta=90                  gamma=90

Temperature:              180 K

|                        | Calculated                                          | Reported                                          |
|------------------------|-----------------------------------------------------|---------------------------------------------------|
| Volume                 | 13583.4 (14)                                        | 13583.4 (14)                                      |
| Space group            | P b n b                                             | P b n b                                           |
| Hall group             | -P 2bc 2ab                                          | -P 2bc 2ab                                        |
| Moiety formula         | 2 (C60), 2 (C24 H20 Se6 Sn4),<br>2 (C7 H8), C4 H8 O | C24 H20 Se6 Sn4, C7 H8,<br>0.5 (C4 H8 O), 1 (C60) |
| Sum formula            | C186 H64 O Se12 Sn8                                 | C93 H32 O0.50 Se6 Sn4                             |
| Mr                     | 4211.57                                             | 2105.70                                           |
| Dx, g cm <sup>-3</sup> | 2.059                                               | 2.059                                             |
| Z                      | 4                                                   | 8                                                 |
| Mu (mm <sup>-1</sup> ) | 10.627                                              | 10.627                                            |
| F000                   | 7984.0                                              | 7984.0                                            |
| F000'                  | 7946.98                                             |                                                   |
| h, k, lmax             | 22, 30, 35                                          | 22, 30, 35                                        |
| Nref                   | 13304                                               | 12910                                             |
| Tmin, Tmax             | 0.397, 0.588                                        | 0.397, 0.588                                      |
| Tmin'                  | 0.300                                               |                                                   |

Correction method= # Reported T Limits: Tmin=0.397 Tmax=0.588  
AbsCorr = MULTI-SCAN

Data completeness= 0.970      Theta(max)= 55.716

R(reflections)= 0.0344 ( 6521)

wR2(reflections)=  
0.0469 ( 12910)

S = 0.875

Npar= 1547

---

The following ALERTS were generated. Each ALERT has the format

**test-name\_ALERT\_alert-type\_alert-level.**

Click on the hyperlinks for more details of the test.

---

### Alert level C

ABSTY02\_ALERT\_1\_C An \_exptl\_absorpt\_correction\_type has been given without  
a literature citation. This should be contained in the  
\_exptl\_absorpt\_process\_details field.

Absorption correction given as multi-scan

|                   |                                                           |               |
|-------------------|-----------------------------------------------------------|---------------|
| PLAT042_ALERT_1_C | Calc. and Reported MoietyFormula Strings Differ           | Please Check  |
|                   | Calc: 2(C60), 2(C24 H20 Se6 Sn4), 2(C7 H8), C4 H8 O       |               |
|                   | Rep.: C24 H20 Se6 Sn4, C7 H8, 0.5(C4 H8 O), 1(C60)        |               |
| PLAT088_ALERT_3_C | Poor Data / Parameter Ratio .....                         | 8.35 Note     |
| PLAT213_ALERT_2_C | Atom C4A has ADP max/min Ratio .....                      | 3.6 prolat    |
| PLAT213_ALERT_2_C | Atom C7A has ADP max/min Ratio .....                      | 3.3 prolat    |
| PLAT213_ALERT_2_C | Atom C27A has ADP max/min Ratio .....                     | 3.3 prolat    |
| PLAT213_ALERT_2_C | Atom C28A has ADP max/min Ratio .....                     | 3.4 prolat    |
| PLAT213_ALERT_2_C | Atom C29A has ADP max/min Ratio .....                     | 3.2 oblate    |
| PLAT213_ALERT_2_C | Atom C53A has ADP max/min Ratio .....                     | 3.2 prolat    |
| PLAT213_ALERT_2_C | Atom C3B has ADP max/min Ratio .....                      | 3.3 oblate    |
| PLAT213_ALERT_2_C | Atom C7B has ADP max/min Ratio .....                      | 3.2 prolat    |
| PLAT213_ALERT_2_C | Atom C31B has ADP max/min Ratio .....                     | 3.7 oblate    |
| PLAT213_ALERT_2_C | Atom C38B has ADP max/min Ratio .....                     | 3.6 oblate    |
| PLAT234_ALERT_4_C | Large Hirshfeld Difference C79 --C84 .                    | 0.17 Ang.     |
| PLAT234_ALERT_4_C | Large Hirshfeld Difference C82 --C83 .                    | 0.17 Ang.     |
| PLAT244_ALERT_4_C | Low 'Solvent' Ueq as Compared to Neighbors of             | C90 Check     |
| PLAT260_ALERT_2_C | Large Average Ueq of Residue Including C85                | 0.125 Check   |
| PLAT342_ALERT_3_C | Low Bond Precision on C-C Bonds .....                     | 0.01148 Ang.  |
| PLAT412_ALERT_2_C | Short Intra XH3 .. XHn H89 ..H91B .                       | 1.89 Ang.     |
|                   | x,y,z =                                                   | 1_555 Check   |
| PLAT905_ALERT_3_C | Negative K value in the Analysis of Variance ...          | -0.464 Report |
| PLAT911_ALERT_3_C | Missing FCF Refl Between Thmin & STh/L= 0.600             | 91 Report     |
|                   | 2 0 0, 4 0 0, 0 2 0, 2 2 0, 3 2 0, 4 2 0,                 |               |
|                   | 0 6 0, 0 20 0, 11 24 0, 3 0 1, 2 1 1, 3 1 1,              |               |
|                   | 4 1 1, 3 2 1, 4 2 1, 3 3 1, 4 3 1, 2 0 2,                 |               |
|                   | 4 0 2, 3 1 2, 4 1 2, 5 1 2, 4 2 2, 3 3 2,                 |               |
|                   | 4 3 2, 3 4 2, 4 4 2, 3 0 3, 3 1 3, 4 1 3,                 |               |
|                   | 0 16 3, 1 16 3, 0 18 3, 4 0 4, 3 1 4, 4 1 4,              |               |
|                   | 0 2 4, 0 16 4, 0 18 4, 3 19 5, 4 19 5, 9 27 5,            |               |
|                   | 0 4 6, 9 27 6, 1 5 7, 0 16 7, 3 29 8, 1 29 9,             |               |
|                   | 1 18 12, 8 26 12, 7 26 13, 0 10 14, 12 18 14, 6 14 16,    |               |
|                   | 13 20 16, 0 26 16, 10 20 17, 11 21 17, 18 0 18, 19 1 18,  |               |
|                   | 5 13 18, 3 14 18, 2 18 18, 9 21 18, 10 21 18, 11 21 18,   |               |
|                   | 15 13 19, 9 21 19, 9 22 19, 10 10 20, 14 11 20, 13 13 20, |               |
|                   | 14 13 20, 14 14 20, 13 17 20, 5 21 20, 8 2 21, 13 14 21,  |               |
|                   | 13 15 21, 5 22 21, 7 1 22, 3 23 22, 5 0 23, 11 17 23,     |               |
|                   | 0 22 23, 1 22 23, 13 13 24, 8 17 25, 0 0 26, 14 0 26,     |               |
|                   | 0 0 32,                                                   |               |

---

### Alert level G

ABSMU01\_ALERT\_1\_G Calculation of \_exptl\_absorpt\_correction\_mu  
not performed for this radiation type.

|                   |                                                  |            |
|-------------------|--------------------------------------------------|------------|
| PLAT002_ALERT_2_G | Number of Distance or Angle Restraints on AtSite | 116 Note   |
| PLAT003_ALERT_2_G | Number of Uiso or U(i,j) Restrained non-H Atoms  | 144 Report |

|                   |                                                  |        |        |
|-------------------|--------------------------------------------------|--------|--------|
| PLAT045_ALERT_1_G | Calculated and Reported Z Differ by a Factor ... | 0.500  | Check  |
| PLAT066_ALERT_1_G | Predicted and Reported Tmin&Tmax Range Identical | ?      | Check  |
| PLAT171_ALERT_4_G | The CIF-Embedded .res File Contains EADP Records | 1      | Report |
| PLAT172_ALERT_4_G | The CIF-Embedded .res File Contains DFIX Records | 3      | Report |
| PLAT173_ALERT_4_G | The CIF-Embedded .res File Contains DANG Records | 1      | Report |
| PLAT176_ALERT_4_G | The CIF-Embedded .res File Contains SADI Records | 78     | Report |
| PLAT178_ALERT_4_G | The CIF-Embedded .res File Contains SIMU Records | 7      | Report |
| PLAT186_ALERT_4_G | The CIF-Embedded .res File Contains ISOR Records | 11     | Report |
| PLAT187_ALERT_4_G | The CIF-Embedded .res File Contains RIGU Records | 2      | Report |
| PLAT188_ALERT_3_G | A Non-default SIMU Restraint Value has been used | 0.0100 | Report |
| PLAT188_ALERT_3_G | A Non-default SIMU Restraint Value has been used | 0.0100 | Report |
| PLAT188_ALERT_3_G | A Non-default SIMU Restraint Value has been used | 0.0100 | Report |
| PLAT188_ALERT_3_G | A Non-default SIMU Restraint Value has been used | 0.0100 | Report |
| PLAT188_ALERT_3_G | A Non-default SIMU Restraint Value has been used | 0.0100 | Report |
| PLAT188_ALERT_3_G | A Non-default SIMU Restraint Value has been used | 0.0100 | Report |
| PLAT190_ALERT_3_G | A Non-default RIGU Restraint Value for First Par | 0.0100 | Report |
| PLAT190_ALERT_3_G | A Non-default RIGU Restraint Value for SecondPar | 0.0200 | Report |
| PLAT191_ALERT_3_G | A Non-default SADI Restraint Value has been used | 0.0400 | Report |
| PLAT191_ALERT_3_G | A Non-default SADI Restraint Value has been used | 0.0400 | Report |
| PLAT191_ALERT_3_G | A Non-default SADI Restraint Value has been used | 0.0400 | Report |
| PLAT191_ALERT_3_G | A Non-default SADI Restraint Value has been used | 0.0400 | Report |
| PLAT191_ALERT_3_G | A Non-default SADI Restraint Value has been used | 0.0400 | Report |
| PLAT191_ALERT_3_G | A Non-default SADI Restraint Value has been used | 0.0400 | Report |
| PLAT191_ALERT_3_G | A Non-default SADI Restraint Value has been used | 0.0400 | Report |
| PLAT191_ALERT_3_G | A Non-default SADI Restraint Value has been used | 0.0400 | Report |
| PLAT191_ALERT_3_G | A Non-default SADI Restraint Value has been used | 0.0400 | Report |
| PLAT231_ALERT_4_G | Hirshfeld Test (Solvent) C86 --C87 .             | 6.0    | s.u.   |
| PLAT231_ALERT_4_G | Hirshfeld Test (Solvent) C90 --C91 .             | 14.8   | s.u.   |
| PLAT300_ALERT_4_G | Atom Site Occupancy of O1 Constrained at         | 0.5    | Check  |
| PLAT300_ALERT_4_G | Atom Site Occupancy of C92 Constrained at        | 0.5    | Check  |
| PLAT300_ALERT_4_G | Atom Site Occupancy of C93 Constrained at        | 0.5    | Check  |
| PLAT300_ALERT_4_G | Atom Site Occupancy of C94 Constrained at        | 0.5    | Check  |
| PLAT300_ALERT_4_G | Atom Site Occupancy of C95 Constrained at        | 0.5    | Check  |
| PLAT300_ALERT_4_G | Atom Site Occupancy of H92A Constrained at       | 0.5    | Check  |
| PLAT300_ALERT_4_G | Atom Site Occupancy of H92B Constrained at       | 0.5    | Check  |
| PLAT300_ALERT_4_G | Atom Site Occupancy of H93A Constrained at       | 0.5    | Check  |
| PLAT300_ALERT_4_G | Atom Site Occupancy of H93B Constrained at       | 0.5    | Check  |
| PLAT300_ALERT_4_G | Atom Site Occupancy of H94A Constrained at       | 0.5    | Check  |
| PLAT300_ALERT_4_G | Atom Site Occupancy of H94B Constrained at       | 0.5    | Check  |
| PLAT300_ALERT_4_G | Atom Site Occupancy of H95A Constrained at       | 0.5    | Check  |
| PLAT300_ALERT_4_G | Atom Site Occupancy of H95B Constrained at       | 0.5    | Check  |
| PLAT301_ALERT_3_G | Main Residue Disorder .....(Resd 1)              | 100%   | Note   |
| PLAT301_ALERT_3_G | Main Residue Disorder .....(Resd 2)              | 100%   | Note   |
| PLAT302_ALERT_4_G | Anion/Solvent/Minor-Residue Disorder (Resd 3)    | 18%    | Note   |
| PLAT302_ALERT_4_G | Anion/Solvent/Minor-Residue Disorder (Resd 5)    | 100%   | Note   |
| PLAT304_ALERT_4_G | Non-Integer Number of Atoms in ..... (Resd 1)    | 35.70  | Check  |
| PLAT304_ALERT_4_G | Non-Integer Number of Atoms in ..... (Resd 2)    | 24.30  | Check  |
| PLAT304_ALERT_4_G | Non-Integer Number of Atoms in ..... (Resd 5)    | 6.50   | Check  |
| PLAT398_ALERT_2_G | Deviating C-O-C Angle From 120 for O1 .          | 133.1  | Degree |
| PLAT432_ALERT_2_G | Short Inter X...Y Contact Sel ..ClA .            | 3.38   | Ang.   |
|                   | 1/2-x,1/2+y,z =                                  | 7_665  | Check  |
| PLAT789_ALERT_4_G | Atoms with Negative _atom_site_disorder_group #  | 13     | Check  |
| PLAT811_ALERT_5_G | No ADDSYM Analysis: Too Many Excluded Atoms .... | !      | Info   |
| PLAT822_ALERT_4_G | CIF-embedded .res Contains Negative PART Numbers | 1      | Check  |
| PLAT860_ALERT_3_G | Number of Least-Squares Restraints .....         | 4539   | Note   |

|                                                                    |       |      |
|--------------------------------------------------------------------|-------|------|
| PLAT910_ALERT_3_G Missing # of FCF Reflection(s) Below Theta(Min). | 2     | Note |
| 1 0 1, 0 0 2,                                                      |       |      |
| PLAT912_ALERT_4_G Missing # of FCF Reflections Above STh/L= 0.600  | 301   | Note |
| PLAT913_ALERT_3_G Missing # of Very Strong Reflections in FCF .... | 1     | Note |
| 0 0 2,                                                             |       |      |
| PLAT941_ALERT_3_G Average HKL Measurement Multiplicity .....       | 4.0   | Low  |
| PLAT969_ALERT_5_G The 'Henn et al.' R-Factor-gap value .....       | 0.887 | Note |
| Predicted wR2: Based on SigI**2 5.30 or SHELX Weight 5.36          |       |      |
| PLAT978_ALERT_2_G Number C-C Bonds with Positive Residual Density. | 2     | Info |

---

|    |                      |                                                              |
|----|----------------------|--------------------------------------------------------------|
| 0  | <b>ALERT level A</b> | = Most likely a serious problem - resolve or explain         |
| 0  | <b>ALERT level B</b> | = A potentially serious problem, consider carefully          |
| 21 | <b>ALERT level C</b> | = Check. Ensure it is not caused by an omission or oversight |
| 65 | <b>ALERT level G</b> | = General information/check it is not something unexpected   |
|    |                      |                                                              |
| 5  | ALERT type 1         | CIF construction/syntax error, inconsistent or missing data  |
| 17 | ALERT type 2         | Indicator that the structure model may be wrong or deficient |
| 29 | ALERT type 3         | Indicator that the structure quality may be low              |
| 33 | ALERT type 4         | Improvement, methodology, query or suggestion                |
| 2  | ALERT type 5         | Informative message, check                                   |

---

It is advisable to attempt to resolve as many as possible of the alerts in all categories. Often the minor alerts point to easily fixed oversights, errors and omissions in your CIF or refinement strategy, so attention to these fine details can be worthwhile. In order to resolve some of the more serious problems it may be necessary to carry out additional measurements or structure refinements. However, the purpose of your study may justify the reported deviations and the more serious of these should normally be commented upon in the discussion or experimental section of a paper or in the "special\_details" fields of the CIF. checkCIF was carefully designed to identify outliers and unusual parameters, but every test has its limitations and alerts that are not important in a particular case may appear. Conversely, the absence of alerts does not guarantee there are no aspects of the results needing attention. It is up to the individual to critically assess their own results and, if necessary, seek expert advice.

### Publication of your CIF in IUCr journals

A basic structural check has been run on your CIF. These basic checks will be run on all CIFs submitted for publication in IUCr journals (*Acta Crystallographica*, *Journal of Applied Crystallography*, *Journal of Synchrotron Radiation*); however, if you intend to submit to *Acta Crystallographica Section C* or *E* or *IUCrData*, you should make sure that full publication checks are run on the final version of your CIF prior to submission.

### Publication of your CIF in other journals

Please refer to the *Notes for Authors* of the relevant journal for any special instructions relating to CIF submission.

PLATON version of 13/05/2024; check.def file version of 04/05/2024

Datablock 3 - ellipsoid plot

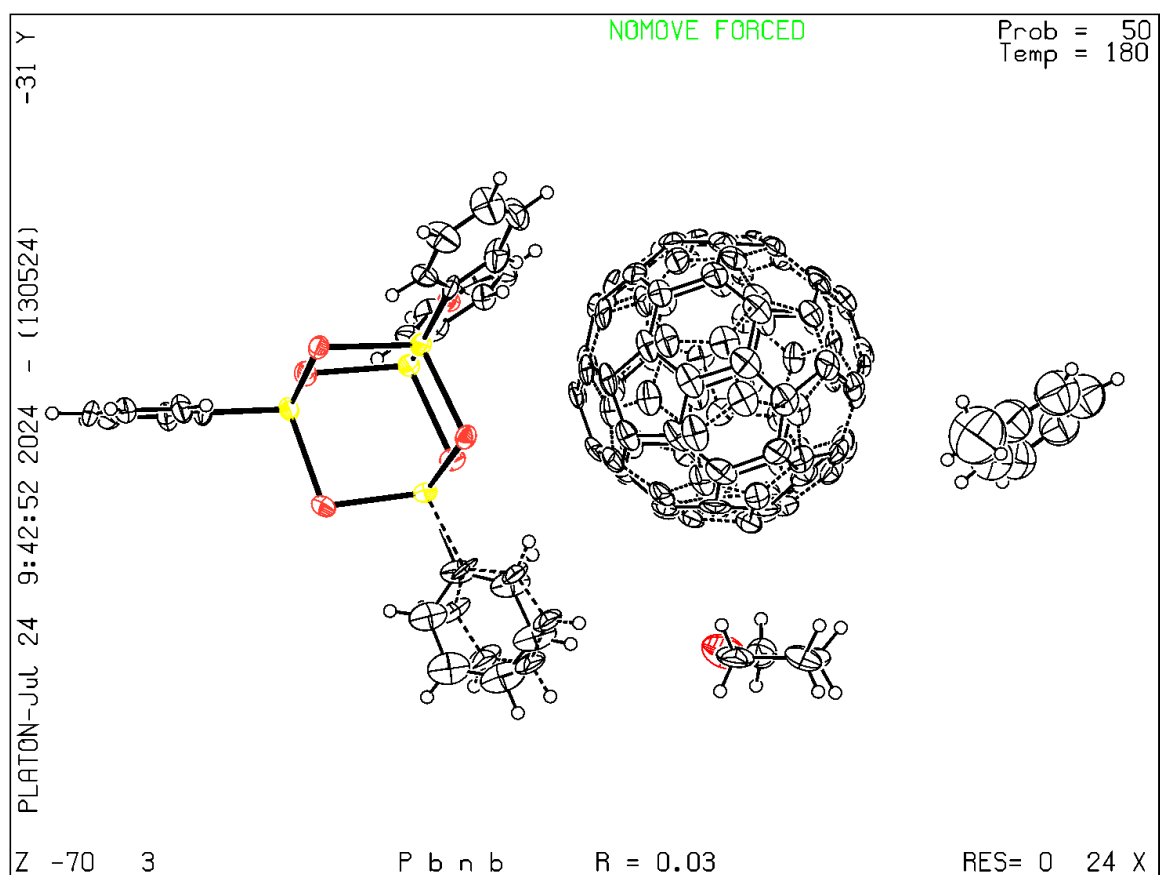

Supplement: Supplementary file 1 [file 51a3b5f777577b76f4b5f177.pdf]
