# Supplementary material for: The ‘π-Trap’ as an Unrestricted Crystal Sponge for Inherently Amorphous Cluster Compounds
Source: Research Square preprint supplement (doi:10.21203/rs.3.rs-5953585/v1), 2025-02-24

## checkCIF/PLATON report

Structure factors have been supplied for datablock(s) 1

THIS REPORT IS FOR GUIDANCE ONLY. IF USED AS PART OF A REVIEW PROCEDURE FOR PUBLICATION, IT SHOULD NOT REPLACE THE EXPERTISE OF AN EXPERIENCED CRYSTALLOGRAPHIC REFEREE.

No syntax errors found.      CIF dictionary      Interpreting this report

### Datablock: 1

---

|                 |                                        |                                                     |                           |
|-----------------|----------------------------------------|-----------------------------------------------------|---------------------------|
| Bond precision: | C-C = 0.0218 A                         | Wavelength=1.34143                                  |                           |
| Cell:           | a=27.2073 (14)<br>alpha=90             | b=27.2073 (14)<br>beta=90                           | c=35.229 (2)<br>gamma=120 |
| Temperature:    | 150 K                                  |                                                     |                           |
|                 | Calculated                             | Reported                                            |                           |
| Volume          | 22584 (3)                              | 22584 (3)                                           |                           |
| Space group     | R -3                                   | R -3                                                |                           |
| Hall group      | -R 3                                   | -R 3                                                |                           |
| Moiety formula  | C60, 2 (C24 H20 S6 Sn4) [+<br>solvent] | 2 (C24 H20 S6 Sn4), C60,<br>1.2 [C7H8], 1.2 [C4H8O] |                           |
| Sum formula     | C108 H40 S12 Sn8 [+<br>solvent]        | C108 H40 S12 Sn8                                    |                           |
| Mr              | 2671.80                                | 2671.64                                             |                           |
| Dx, g cm-3      | 1.768                                  | 1.768                                               |                           |
| Z               | 9                                      | 9                                                   |                           |
| Mu (mm-1)       | 12.436                                 | 12.267                                              |                           |
| F000            | 11520.0                                | 11520.0                                             |                           |
| F000'           | 11577.95                               |                                                     |                           |
| h, k, lmax      | 32, 32, 41                             | 32, 32, 41                                          |                           |
| Nref            | 8708                                   | 8688                                                |                           |
| Tmin, Tmax      | 0.165, 0.293                           | 0.165, 0.293                                        |                           |
| Tmin'           | 0.057                                  |                                                     |                           |

Correction method= # Reported T Limits: Tmin=0.165 Tmax=0.293  
AbsCorr = MULTI-SCAN

Data completeness= 0.998      Theta (max)= 52.498

R(reflections)= 0.0757( 5356)

wR2(reflections)=  
0.2046( 8688)

S = 1.056

Npar= 687

---

The following ALERTS were generated. Each ALERT has the format

**test-name\_ALERT\_alert-type\_alert-level.**

Click on the hyperlinks for more details of the test.

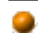

#### Alert level B

PLAT342\_ALERT\_3\_B Low Bond Precision on C-C Bonds ..... 0.02179 Ang.

**Author Response: This is due to a slightly limited quality of the crystal and the diffraction data.**

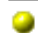

#### Alert level C

RINTA01\_ALERT\_3\_C The value of Rint is greater than 0.12

Rint given 0.129

PLAT020\_ALERT\_3\_C The Value of Rint is Greater Than 0.12 ..... 0.129 Report

PLAT906\_ALERT\_3\_C Large K Value in the Analysis of Variance ..... 4.609 Check

PLAT911\_ALERT\_3\_C Missing FCF Refl Between Thmin & STh/L= 0.591 20 Report

0 3 0, -2 4 0, -7 13 1, 11 19 1, -5 30 1, -19 30 2,  
1 3 4, 0 7 5, 12 19 5, 12 18 6, -20 31 6, 2 13 10,  
-14 12 13, -22 15 17, -9 24 18, -11 20 20, -1 4 22, -1 10 25,  
-9 24 27, -11 7 39,

PLAT971\_ALERT\_2\_C Check Calcd Resid. Dens. 1.41Ang From S6 1.52 eA-3

PLAT973\_ALERT\_2\_C Check Calcd Positive Resid. Density on Sn4 1.30 eA-3

PLAT973\_ALERT\_2\_C Check Calcd Positive Resid. Density on Sn4 1.28 eA-3

PLAT973\_ALERT\_2\_C Check Calcd Positive Resid. Density on Sn1 1.19 eA-3

PLAT973\_ALERT\_2\_C Check Calcd Positive Resid. Density on Sn3 1.09 eA-3

PLAT976\_ALERT\_2\_C Check Calcd Resid. Dens. 0.87Ang From C3 . -0.95 eA-3

PLAT977\_ALERT\_2\_C Check Negative Difference Density on H32 . -0.80 eA-3

PLAT977\_ALERT\_2\_C Check Negative Difference Density on H34 . -0.43 eA-3

PLAT977\_ALERT\_2\_C Check Negative Difference Density on H38 . -0.38 eA-3

PLAT977\_ALERT\_2\_C Check Negative Difference Density on H40 . -0.41 eA-3

PLAT977\_ALERT\_2\_C Check Negative Difference Density on H45 . -0.32 eA-3

PLAT977\_ALERT\_2\_C Check Negative Difference Density on H53B . -0.32 eA-3

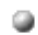

#### Alert level G

FORMU01\_ALERT\_1\_G There is a discrepancy between the atom counts in the  
\_chemical\_formula\_sum and \_chemical\_formula\_moiety. This is  
usually due to the moiety formula being in the wrong format.

Atom count from \_chemical\_formula\_sum: C108 H40 S12 Sn8

Atom count from \_chemical\_formula\_moiety:C116.4 H49.6 S12 Sn8

ABSMU01\_ALERT\_1\_G Calculation of \_exptl\_absorpt\_correction\_mu  
not performed for this radiation type.

PLAT002\_ALERT\_2\_G Number of Distance or Angle Restraints on AtSite 32 Note

PLAT003\_ALERT\_2\_G Number of Uiso or U(i,j) Restrained non-H Atoms 66 Report

PLAT042\_ALERT\_1\_G Calc. and Reported MoietyFormula Strings Differ Please Check

Calc: C60, 2(C24 H20 S6 Sn4)

|                   |                                                            |               |
|-------------------|------------------------------------------------------------|---------------|
|                   | Rep.: 2(C24 H20 S6 Sn4), C60, 1.2[C7H8], 1.2[C4H8O]        |               |
| PLAT051_ALERT_1_G | Mu(calc) and Mu(CIF) Ratio Differs from 1.0 by .           | 1.38 %        |
| PLAT066_ALERT_1_G | Predicted and Reported Tmin&Tmax Range Identical           | ? Check       |
| PLAT072_ALERT_2_G | SHELXL First Parameter in WGHT Unusually Large             | 0.12 Report   |
| PLAT174_ALERT_4_G | The CIF-Embedded .res File Contains FLAT Records           | 1 Report      |
| PLAT176_ALERT_4_G | The CIF-Embedded .res File Contains SADI Records           | 42 Report     |
| PLAT178_ALERT_4_G | The CIF-Embedded .res File Contains SIMU Records           | 1 Report      |
| PLAT186_ALERT_4_G | The CIF-Embedded .res File Contains ISOR Records           | 2 Report      |
| PLAT188_ALERT_3_G | A Non-default SIMU Restraint Value has been used           | 0.0100 Report |
| PLAT191_ALERT_3_G | A Non-default SADI Restraint Value has been used           | 0.0400 Report |
| PLAT191_ALERT_3_G | A Non-default SADI Restraint Value has been used           | 0.0400 Report |
| PLAT191_ALERT_3_G | A Non-default SADI Restraint Value has been used           | 0.0400 Report |
| PLAT191_ALERT_3_G | A Non-default SADI Restraint Value has been used           | 0.0400 Report |
| PLAT191_ALERT_3_G | A Non-default SADI Restraint Value has been used           | 0.0400 Report |
| PLAT191_ALERT_3_G | A Non-default SADI Restraint Value has been used           | 0.0400 Report |
| PLAT191_ALERT_3_G | A Non-default SADI Restraint Value has been used           | 0.0400 Report |
| PLAT191_ALERT_3_G | A Non-default SADI Restraint Value has been used           | 0.0400 Report |
| PLAT191_ALERT_3_G | A Non-default SADI Restraint Value has been used           | 0.0400 Report |
| PLAT191_ALERT_3_G | A Non-default SADI Restraint Value has been used           | 0.0400 Report |
| PLAT191_ALERT_3_G | A Non-default SADI Restraint Value has been used           | 0.0400 Report |
| PLAT191_ALERT_3_G | A Non-default SADI Restraint Value has been used           | 0.0400 Report |
| PLAT191_ALERT_3_G | A Non-default SADI Restraint Value has been used           | 0.0400 Report |
| PLAT191_ALERT_3_G | A Non-default SADI Restraint Value has been used           | 0.0400 Report |
| PLAT191_ALERT_3_G | A Non-default SADI Restraint Value has been used           | 0.0400 Report |
| PLAT191_ALERT_3_G | A Non-default SADI Restraint Value has been used           | 0.0400 Report |
| PLAT191_ALERT_3_G | A Non-default SADI Restraint Value has been used           | 0.0400 Report |
| PLAT191_ALERT_3_G | A Non-default SADI Restraint Value has been used           | 0.0400 Report |
| PLAT302_ALERT_4_G | Anion/Solvent/Minor-Residue Disorder (Resd 2)              | 35% Note      |
| PLAT343_ALERT_2_G | Unusual sp? Angle Range in Main Residue for                | C1 Check      |
| PLAT343_ALERT_2_G | Unusual sp? Angle Range in Main Residue for                | C3 Check      |
| PLAT343_ALERT_2_G | Unusual sp? Angle Range in Main Residue for                | C4 Check      |
| PLAT343_ALERT_2_G | Unusual sp? Angle Range in Main Residue for                | C5 Check      |
| PLAT343_ALERT_2_G | Unusual sp? Angle Range in Main Residue for                | C13 Check     |
| PLAT343_ALERT_2_G | Unusual sp? Angle Range in Main Residue for                | C14 Check     |
| PLAT343_ALERT_2_G | Unusual sp? Angle Range in Main Residue for                | C15 Check     |
| PLAT343_ALERT_2_G | Unusual sp? Angle Range in Main Residue for                | C16 Check     |
| PLAT343_ALERT_2_G | Unusual sp? Angle Range in Main Residue for                | C18 Check     |
| PLAT343_ALERT_2_G | Unusual sp? Angle Range in Main Residue for                | C20 Check     |
| PLAT343_ALERT_2_G | Unusual sp? Angle Range in Main Residue for                | C22 Check     |
| PLAT343_ALERT_2_G | Unusual sp? Angle Range in Main Residue for                | C23 Check     |
| PLAT343_ALERT_2_G | Unusual sp? Angle Range in Main Residue for                | C24 Check     |
| PLAT343_ALERT_2_G | Unusual sp? Angle Range in Main Residue for                | C27 Check     |
| PLAT343_ALERT_2_G | Unusual sp? Angle Range in Main Residue for                | C30 Check     |
| PLAT606_ALERT_4_G | Solvent Accessible VOID(S) in Structure .....              | ! Info        |
| PLAT860_ALERT_3_G | Number of Least-Squares Restraints .....                   | 869 Note      |
| PLAT868_ALERT_4_G | ALERTS Due to the Use of _smtbx_masks Suppressed           | ! Info        |
| PLAT909_ALERT_3_G | Percentage of I>2sig(I) Data at Theta(Max) Still           | 32% Note      |
| PLAT933_ALERT_2_G | Number of HKL-OMIT Records in Embedded .res File           | 11 Note       |
|                   | -7 13 1, 2 13 10, -11 20 20, -1 4 22, -2 4 0, -22 15 17,   |               |
|                   | -1 10 25, 0 7 5, 0 3 0, -14 12 13, 1 3 4,                  |               |
| PLAT961_ALERT_5_G | Dataset Contains no Negative Intensities .....             | Please Check  |
| PLAT967_ALERT_5_G | Note: Two-Theta Cutoff Value in Embedded .res ..           | 105.0 Degree  |
| PLAT969_ALERT_5_G | The 'Henn et al.' R-Factor-gap value .....                 | 3.741 Note    |
|                   | Predicted wR2: Based on SigI**2 5.47 or SHELX Weight 19.37 |               |
| PLAT978_ALERT_2_G | Number C-C Bonds with Positive Residual Density.           | 0 Info        |
| PLAT984_ALERT_1_G | The Sn-f'= 0.1615 Deviates from the B&C-Value              | 0.1164 Check  |
| PLAT985_ALERT_1_G | The Sn-f''= 4.3614 Deviates from the B&C-Value             | 4.3256 Check  |

0 **ALERT level A** = Most likely a serious problem - resolve or explain  
1 **ALERT level B** = A potentially serious problem, consider carefully  
16 **ALERT level C** = Check. Ensure it is not caused by an omission or oversight  
56 **ALERT level G** = General information/check it is not something unexpected

7 ALERT type 1 CIF construction/syntax error, inconsistent or missing data  
32 ALERT type 2 Indicator that the structure model may be wrong or deficient  
24 ALERT type 3 Indicator that the structure quality may be low  
7 ALERT type 4 Improvement, methodology, query or suggestion  
3 ALERT type 5 Informative message, check

---

It is advisable to attempt to resolve as many as possible of the alerts in all categories. Often the minor alerts point to easily fixed oversights, errors and omissions in your CIF or refinement strategy, so attention to these fine details can be worthwhile. In order to resolve some of the more serious problems it may be necessary to carry out additional measurements or structure refinements. However, the purpose of your study may justify the reported deviations and the more serious of these should normally be commented upon in the discussion or experimental section of a paper or in the "special\_details" fields of the CIF. checkCIF was carefully designed to identify outliers and unusual parameters, but every test has its limitations and alerts that are not important in a particular case may appear. Conversely, the absence of alerts does not guarantee there are no aspects of the results needing attention. It is up to the individual to critically assess their own results and, if necessary, seek expert advice.

### **Publication of your CIF in IUCr journals**

A basic structural check has been run on your CIF. These basic checks will be run on all CIFs submitted for publication in IUCr journals (*Acta Crystallographica*, *Journal of Applied Crystallography*, *Journal of Synchrotron Radiation*); however, if you intend to submit to *Acta Crystallographica Section C* or *E* or *IUCrData*, you should make sure that full publication checks are run on the final version of your CIF prior to submission.

### **Publication of your CIF in other journals**

Please refer to the *Notes for Authors* of the relevant journal for any special instructions relating to CIF submission.

---

Datablock 1 - ellipsoid plot

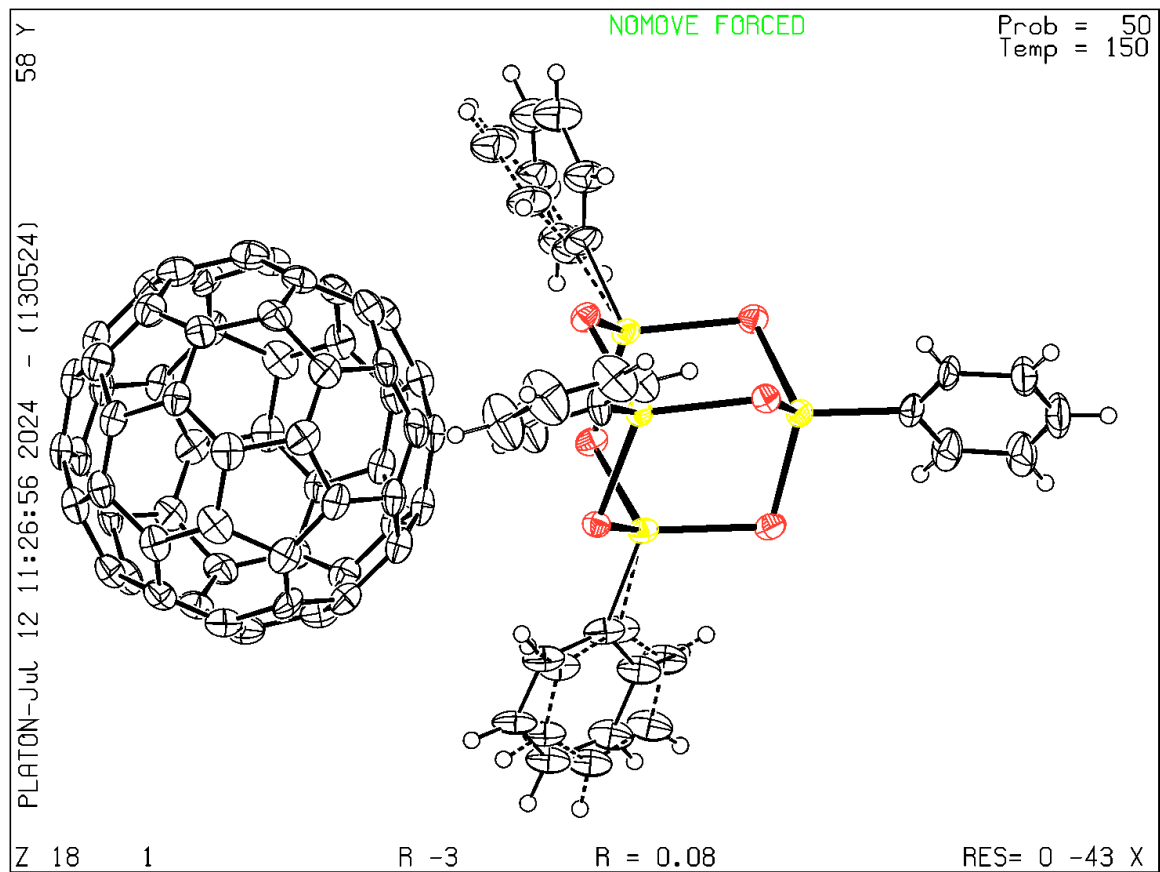

Supplement: Supplementary file 3 [file cd2be5b8fe144a006d9a4c73.pdf]
